# Supplementary material for: Botulinum neurotoxin treatment in jerky and tremulous functional movement disorders: a double-blind, randomised placebo-controlled trial with an open-label extension
Source: PubMed Central journal article supplement — J Neurol Neurosurg Psychiatry. 2019 Jun 20;90(11):1244–50. doi: 10.1136/jnnp-2018-320071 (PMC6860905; doi:10.1136/jnnp-2018-320071), 2019-06-20
Supplement: jnnp-2018-320071supp001.pdf [file jnnp-2018-320071supp001.pdf]

*Legends Videos*

Video 1. Male, 57 years old. Presented with jerks of the right shoulder/arm after throwing a snow ball. The video shows that the jerks are entrainable.

Video 2. Male, 66 years old. Presented with sudden onset of tremor of the right arm. The video shows attenuation/distractibility of the tremor while performing a mental task.

Video 3. Female, 74 years old. Presented with abdominal jerks after her dog died. The video shows a typical phenomenology of functional myoclonus.
