# Supplementary material for: Botulinum neurotoxin treatment in jerky and tremulous functional movement disorders: a double-blind, randomised placebo-controlled trial with an open-label extension
Source: PubMed Central journal article supplement — J Neurol Neurosurg Psychiatry. 2019 Jun 20;90(11):1244–50. doi: 10.1136/jnnp-2018-320071 (PMC6860905; doi:10.1136/jnnp-2018-320071), 2019-06-20
Supplement: jnnp-2018-320071supp002.pdf [file jnnp-2018-320071supp002.pdf]

## Supplementary data file

### Appendix 1. Outcome measures

#### Outcome measures

Disability was measured using the AMC Linear Disability Score (ALDS) (a generic self-assessment scale which includes instrumental activities of daily living (ADL)).<sup>1</sup> The ALDS ranges from 0 and 100; higher scores indicate a better functional status.

Quality of life (QoL) was assessed using the 36-item Short Form Health Survey (SF-36).<sup>2</sup> Two dimension scores can be derived from 8 subscale scores: the Physical Component Summary and the Mental Component Summary. Both summary scores were normalized to a general Dutch population mean of 50 and a standard deviation of 10.<sup>3</sup> Higher scores indicate a better HRQL.<sup>4</sup>

Psychiatric evaluation included the Mini-International-Neuropsychiatric Interview – Plus (MINI-Plus), screening for possible psychiatric co-morbidity according to DSM-IV criteria.<sup>4</sup>

Several quantitative questionnaires concerning psychiatric symptoms were assessed too, including the Montgomery Asberg Depression Rating Scale (MADRS) (10 item interview, scores ranging from 0-60, higher scores indicating more severe symptoms) and The Beck Depression Inventory (BDI)<sup>5</sup> (21 item self-report scale, ranging from 0-63, higher scores indicating more severe symptoms) for depressive symptoms; the Beck Anxiety Inventory (BAI)<sup>6</sup> (21 item self-report scale, ranging from 0-63, higher scores indicating more severe symptoms) and Liebowitz Social Anxiety Scale (LSAS)<sup>7</sup> (48 item self-report scale, scores ranging from 0-144, higher scores indicating more severe symptoms) for anxiety and the Obsessive-Compulsive Inventory (OCI-R)<sup>8</sup> (18 item self-report, scores ranging from 0-72, higher scores indicating more severe symptoms) for obsessive-compulsive symptoms.

### References

1. Holman R, Weisscher N, Glas CA, et al. The Academic Medical Center Linear Disability Score (ALDS) item bank: item response theory analysis in a mixed patient population. *Health QualLife Outcomes* 2005; **3**: 83.
2. Ware JE, Jr., Sherbourne CD. The MOS 36-item short-form health survey (SF-36). I. Conceptual framework and item selection. *Med Care* 1992; **30**(6): 473-83.
3. Aaronson NK, Muller M, Cohen PD, et al. Translation, validation, and norming of the Dutch language version of the SF-36 Health Survey in community and chronic disease populations. *J Clin Epidemiol* 1998; **51**(11): 1055-68.
4. Sheehan DV, Lecrubier Y, Sheehan KH, et al. The Mini-International Neuropsychiatric Interview (M.I.N.I.): the development and validation of a structured diagnostic psychiatric interview for DSM-IV and ICD-10. *J Clin Psychiatry* 1998; **59 Suppl 20**: 22-33;quiz 4-57.
5. Beck AT, Steer RA. Internal consistencies of the original and revised Beck Depression Inventory. *J Clin Psychol* 1984; **40**(6): 1365-7.
6. Beck AT, Epstein N, Brown G, Steer RA. An inventory for measuring clinical anxiety: psychometric properties. *J Consult Clin Psychol* 1988; **56**(6): 893-7.
7. Heimberg RG, Horner KJ, Juster HR, et al. Psychometric properties of the Liebowitz Social Anxiety Scale. *Psychol Med* 1999; **29**(1): 199-212.
8. Foa EB, Huppert JD, Leiberg S, et al. The Obsessive-Compulsive Inventory: development and validation of a short version. *Psychol Assess* 2002; **14**(4): 485-96.

## Appendix 2. Additional information on methods and results

### Methods

#### *Procedure*

Patients were told that BoNT is a common treatment in movement disorders, but that its efficacy is unknown in functional jerks/tremor. To test this half of the patients would receive BoNT and the other half placebo, which was sterile saline. After two treatment sessions, they would be enrolled in the open-label study where everybody would receive BoNT. Then we would explain how the injections would take place and what common side effects of BoNT are. Also they were instructed when to contact us (hematoma, severe weakness, severe adverse event).

#### *Inter-observer analysis*

Average weighted Kappa and ICC values of pairs of observations were considered as an overall index for concordance among observers. <sup>1</sup> Kappa and ICC values were arbitrarily classified according to Landis and Koch <sup>2</sup> with values <0 indicating no agreement, 0–0.20 as slight, 0.21–0.40 as fair, 0.41–0.60 as moderate, 0.61–0.80 as substantial, and 0.81–1.00 as almost perfect agreement.

### Results

#### *Screening*

Of all excluded patients, 109 patients did not fulfill the inclusion criteria. In 52 (47.8%) of the 109 patients symptoms diminished severely or resolved. In the other 57 (52.3%) reasons were diverse including: not functional (n=13), no jerks/tremor or jerks/tremor not amendable for injection (n=28), terminally ill (n=5), insufficient knowledge of Dutch language (n=2), too old or too young (n=2), previous treatment with BoNT without effect (n=1), coagulation disorder (n=1), too much previous therapies (n=2), moving to other country (n=1), one amputated arm (n=1), complaints present < one

year (n=1). The 18 patients who were excluded for 'other reasons' included: could not be reached (n=16), not approached because files legal complaints (n=1), death wish and died in 2012 (n=1). We don't have follow-up data on these patients unfortunately.

*Selection muscles and doses used per subject*

| Subject | Randomisation | Axial or extremity | Muscles injected                                                                                                                     | Unilateral or bilateral                                                                              | Starting dose per muscle |
|---------|---------------|--------------------|--------------------------------------------------------------------------------------------------------------------------------------|------------------------------------------------------------------------------------------------------|--------------------------|
| Pin 1   | placebo       | extremity          | <ul style="list-style-type: none"> <li>pectoral muscle</li> </ul>                                                                    | <ul style="list-style-type: none"> <li>unilateral</li> </ul>                                         | 100                      |
| Pin 2   | botulinum     | axial              | <ul style="list-style-type: none"> <li>iliopsoas muscle</li> </ul>                                                                   | <ul style="list-style-type: none"> <li>bilateral</li> </ul>                                          | 200                      |
| Pin 3   | botulinum     | axial              | <ul style="list-style-type: none"> <li>iliopsoas muscle</li> </ul>                                                                   | <ul style="list-style-type: none"> <li>bilateral</li> </ul>                                          | 200                      |
| Pin 4   | botulinum     | extremity          | <ul style="list-style-type: none"> <li>trapezius muscle</li> <li>teres major muscle</li> <li>major pectoral muscle</li> </ul>        | <ul style="list-style-type: none"> <li>bilateral</li> <li>bilateral</li> <li>bilateral</li> </ul>    | 50<br>50<br>50           |
| Pin 5   | placebo       | axial              | <ul style="list-style-type: none"> <li>paraspinal muscle Th12</li> <li>paraspinal muscle L2</li> </ul>                               | <ul style="list-style-type: none"> <li>unilateral</li> <li>unilateral</li> </ul>                     | 100<br>100               |
| Pin 6   | placebo       | extremity          | <ul style="list-style-type: none"> <li>SCM</li> <li>levator scapulae muscle</li> <li>trapezius muscle</li> </ul>                     | <ul style="list-style-type: none"> <li>unilateral</li> <li>unilateral</li> <li>unilateral</li> </ul> | 60<br>60<br>120          |
| Pin 7   | placebo       | axial              | <ul style="list-style-type: none"> <li>iliopsoas muscle</li> </ul>                                                                   | <ul style="list-style-type: none"> <li>bilateral</li> </ul>                                          | 200                      |
| Pin 8   | botulinum     | axial              | <ul style="list-style-type: none"> <li>trapezius muscle</li> <li>levator scapulae muscle</li> <li>rectus abdominis muscle</li> </ul> | <ul style="list-style-type: none"> <li>bilateral</li> <li>bilateral</li> <li>bilateral</li> </ul>    | 60<br>60<br>120          |
| Pin 9   | placebo       | axial              | <ul style="list-style-type: none"> <li>iliopsoas muscle</li> </ul>                                                                   | <ul style="list-style-type: none"> <li>bilateral</li> </ul>                                          | 200                      |
| Pin 10  | botulinum     | axial              | <ul style="list-style-type: none"> <li>iliopsoas muscle</li> </ul>                                                                   | <ul style="list-style-type: none"> <li>unilateral</li> </ul>                                         | 200                      |
| Pin 11  | botulinum     | extremity          | <ul style="list-style-type: none"> <li>iliopsoas muscle</li> <li>rectus femoris muscle</li> <li>vastus medialis muscle</li> </ul>    | <ul style="list-style-type: none"> <li>unilateral</li> <li>unilateral</li> <li>unilateral</li> </ul> | 200<br>100<br>50         |
| Pin 12  | placebo       | axial              | <ul style="list-style-type: none"> <li>rectus abdominis muscle</li> </ul>                                                            | <ul style="list-style-type: none"> <li>bilateral</li> </ul>                                          | 120                      |

|        |           |           |                                                                                                                                                 |                                                                                                                              |                      |
|--------|-----------|-----------|-------------------------------------------------------------------------------------------------------------------------------------------------|------------------------------------------------------------------------------------------------------------------------------|----------------------|
| Pin 13 | botulinum | extremity | <ul style="list-style-type: none"> <li>• trapezius muscle</li> <li>• levator scapulae muscle</li> </ul>                                         | <ul style="list-style-type: none"> <li>• unilateral</li> <li>• unilateral</li> </ul>                                         | 80<br>80             |
| Pin 14 | placebo   | extremity | <ul style="list-style-type: none"> <li>• SCM muscle</li> <li>• trapezius muscle</li> <li>• pectoral muscle</li> <li>• deltoid muscle</li> </ul> | <ul style="list-style-type: none"> <li>• bilateral</li> <li>• bilateral</li> <li>• bilateral</li> <li>• bilateral</li> </ul> | 80<br>80<br>80<br>80 |
| Pin 15 | placebo   | extremity | <ul style="list-style-type: none"> <li>• trapezius muscle</li> <li>• major pectoral muscle</li> </ul>                                           | <ul style="list-style-type: none"> <li>• bilateral</li> <li>• bilateral</li> </ul>                                           | 50<br>100            |
| Pin 16 | placebo   | axial     | <ul style="list-style-type: none"> <li>• paraspinal muscle Th8</li> </ul>                                                                       | <ul style="list-style-type: none"> <li>• bilateral</li> </ul>                                                                | 150                  |
| Pin 17 | botulinum | axial     | <ul style="list-style-type: none"> <li>• iliopsoas muscle</li> <li>• rectus abdominis muscle</li> </ul>                                         | <ul style="list-style-type: none"> <li>• bilateral</li> <li>• bilateral</li> </ul>                                           | 160<br>120           |
| Pin 18 | placebo   | axial     | <ul style="list-style-type: none"> <li>• iliopsoas muscle</li> <li>• rectus femoris muscle</li> </ul>                                           | <ul style="list-style-type: none"> <li>• unilateral</li> <li>• unilateral</li> </ul>                                         | 200<br>200           |
| Pin 19 | botulinum | axial     | <ul style="list-style-type: none"> <li>• rectus abdominal muscle</li> </ul>                                                                     | <ul style="list-style-type: none"> <li>• bilateral</li> </ul>                                                                | 200                  |
| Pin 20 | botulinum | axial     | <ul style="list-style-type: none"> <li>• semispinal muscle</li> <li>• rectus abdominis muscle</li> </ul>                                        | <ul style="list-style-type: none"> <li>• bilateral</li> <li>• bilateral</li> </ul>                                           | 60<br>120            |
| Pin 21 | botulinum | extremity | <ul style="list-style-type: none"> <li>• vastus medialis muscle</li> <li>• rectus femoris muscle</li> </ul>                                     | <ul style="list-style-type: none"> <li>• bilateral</li> <li>• bilateral</li> </ul>                                           | 100<br>100           |
| Pin 22 | placebo   | axial     | <ul style="list-style-type: none"> <li>• rectus abdominis muscle</li> </ul>                                                                     | <ul style="list-style-type: none"> <li>• bilateral</li> </ul>                                                                | 150                  |
| Pin 23 | botulinum | extremity | <ul style="list-style-type: none"> <li>• SCM muscle</li> </ul>                                                                                  | <ul style="list-style-type: none"> <li>• bilateral</li> </ul>                                                                | 40                   |
| Pin 24 | placebo   | axial     | <ul style="list-style-type: none"> <li>• iliopsoas muscle</li> <li>• rectus abdominis muscle</li> </ul>                                         | <ul style="list-style-type: none"> <li>• bilateral</li> <li>• bilateral</li> </ul>                                           | 120<br>120           |
| Pin 25 | placebo   | extremity | <ul style="list-style-type: none"> <li>• major pectoral muscle</li> </ul>                                                                       | <ul style="list-style-type: none"> <li>• bilateral</li> </ul>                                                                | 60                   |

|        |           |           |                                                                                                                                                         |                                                                                                            |                  |
|--------|-----------|-----------|---------------------------------------------------------------------------------------------------------------------------------------------------------|------------------------------------------------------------------------------------------------------------|------------------|
| Pin 26 | placebo   | extremity | <ul style="list-style-type: none"> <li>• trapezius muscle</li> <li>• major pectoral muscle</li> <li>• deltoid muscle</li> </ul>                         | <ul style="list-style-type: none"> <li>• unilateral</li> <li>• unilateral</li> <li>• unilateral</li> </ul> | 40<br>80<br>80   |
| Pin 27 | botulinum | axial     | <ul style="list-style-type: none"> <li>• rectus abdominis muscle</li> <li>• iliopsoas muscle</li> <li>• vastus medialis muscle</li> </ul>               | <ul style="list-style-type: none"> <li>• unilateral</li> <li>• unilateral</li> <li>• unilateral</li> </ul> | 120<br>120<br>60 |
| Pin 28 | botulinum | axial     | <ul style="list-style-type: none"> <li>• rectus abdominis muscle</li> </ul>                                                                             | <ul style="list-style-type: none"> <li>• bilateral</li> </ul>                                              | 120              |
| Pin 29 | botulinum | axial     | <ul style="list-style-type: none"> <li>• iliopsoas muscle</li> </ul>                                                                                    | <ul style="list-style-type: none"> <li>• bilateral</li> </ul>                                              | 200              |
| Pin 30 | botulinum | extremity | <ul style="list-style-type: none"> <li>• frontal muscle</li> <li>• auricularis superior muscle</li> </ul>                                               | <ul style="list-style-type: none"> <li>• unilateral</li> <li>• unilateral</li> </ul>                       | 10<br>10         |
| Pin 31 | placebo   | extremity | <ul style="list-style-type: none"> <li>• biceps brachii muscle</li> <li>• deltoid muscle</li> <li>• extensor carpi radial muscle</li> </ul>             | <ul style="list-style-type: none"> <li>• unilateral</li> <li>• unilateral</li> <li>• unilateral</li> </ul> | 120<br>120<br>40 |
| Pin 32 | botulinum | extremity | <ul style="list-style-type: none"> <li>• pectoral muscle</li> </ul>                                                                                     | <ul style="list-style-type: none"> <li>• bilateral</li> </ul>                                              | 80               |
| Pin 33 | botulinum | extremity | <ul style="list-style-type: none"> <li>• biceps brachii muscle</li> <li>• flexor carpi radial muscle</li> </ul>                                         | <ul style="list-style-type: none"> <li>• unilateral</li> <li>• unilateral</li> </ul>                       | 100<br>60        |
| Pin 34 | placebo   | extremity | <ul style="list-style-type: none"> <li>• flexor carpi radial muscle</li> <li>• extensor carpi radial muscle</li> <li>• pronator teres muscle</li> </ul> | <ul style="list-style-type: none"> <li>• unilateral</li> <li>• unilateral</li> <li>• unilateral</li> </ul> | 80<br>30<br>40   |
| Pin 35 | placebo   | extremity | <ul style="list-style-type: none"> <li>• abductor digiti V muscle</li> </ul>                                                                            | <ul style="list-style-type: none"> <li>• unilateral</li> </ul>                                             | 30               |
| Pin 36 | botulinum | extremity | <ul style="list-style-type: none"> <li>• flexor carpi radial muscle</li> <li>• extensor carpi radial</li> </ul>                                         | <ul style="list-style-type: none"> <li>• unilateral</li> <li>• unilateral</li> </ul>                       | 120<br>40        |

|        |           |           | muscle                                                                                                                                             |                                                                                                      |                |
|--------|-----------|-----------|----------------------------------------------------------------------------------------------------------------------------------------------------|------------------------------------------------------------------------------------------------------|----------------|
| Pin 37 | placebo   | axial     | <ul style="list-style-type: none"> <li>rectus abdominis muscle</li> <li>iliopsoas muscle</li> </ul>                                                | <ul style="list-style-type: none"> <li>bilateral</li> <li>bilateral</li> </ul>                       | 120<br>100     |
| Pin 38 | placebo   | extremity | <ul style="list-style-type: none"> <li>splenius capitis muscle</li> <li>SCM muscle</li> </ul>                                                      | <ul style="list-style-type: none"> <li>unilateral</li> <li>unilateral</li> </ul>                     | 100<br>30      |
| Pin 39 | botulinum | extremity | <ul style="list-style-type: none"> <li>supinator teres muscle</li> <li>pronator teres muscle</li> </ul>                                            | <ul style="list-style-type: none"> <li>unilateral</li> <li>unilateral</li> </ul>                     | 40<br>80       |
| Pin 40 | placebo   | axial     | <ul style="list-style-type: none"> <li>rectus abdominis muscle</li> <li>abdominal oblique muscle</li> </ul>                                        | <ul style="list-style-type: none"> <li>bilateral</li> <li>bilateral</li> </ul>                       | 120<br>60      |
| Pin 41 | placebo   | extremity | <ul style="list-style-type: none"> <li>extensor carpi radial muscle</li> <li>flexor carpi radial muscle</li> <li>triceps brachii muscle</li> </ul> | <ul style="list-style-type: none"> <li>unilateral</li> <li>unilateral</li> <li>unilateral</li> </ul> | 40<br>80<br>80 |
| Pin 42 | botulinum | extremity | <ul style="list-style-type: none"> <li>quadriceps femoris muscle</li> </ul>                                                                        | <ul style="list-style-type: none"> <li>unilateral</li> </ul>                                         | 160            |
| Pin 43 | placebo   | extremity | <ul style="list-style-type: none"> <li>extensor carpi radial muscle</li> <li>triceps brachii muscle</li> </ul>                                     | <ul style="list-style-type: none"> <li>unilateral</li> <li>unilateral</li> </ul>                     | 40<br>120      |
| Pin 44 | botulinum | axial     | <ul style="list-style-type: none"> <li>rectus abdominis muscle</li> </ul>                                                                          | <ul style="list-style-type: none"> <li>bilateral</li> </ul>                                          | 120            |
| Pin 45 | placebo   | axial     | <ul style="list-style-type: none"> <li>paraspinal muscle Th12-L5</li> </ul>                                                                        | <ul style="list-style-type: none"> <li>bilateral</li> </ul>                                          | 180            |
| Pin 46 | botulinum | extremity | <ul style="list-style-type: none"> <li>pterygoideus lateral muscle</li> <li>depressor anguli oris muscle</li> <li>platysma muscle</li> </ul>       | <ul style="list-style-type: none"> <li>unilateral</li> <li>unilateral</li> <li>unilateral</li> </ul> | 30<br>10<br>10 |



|        |           |       |                         |             |     |
|--------|-----------|-------|-------------------------|-------------|-----|
| Pin 47 | botulinum | axial | • major pectoral muscle | • bilateral | 60  |
| Pin 48 | botulinum | axial | • iliopsoas muscle      | • bilateral | 160 |

### *Open-label extension*

Compared to the end of the trial 19 of 43 patients (44.2%) showed improvement (score 1,2 or 3) of motor symptoms on the CGI-I assessed by the investigators (score 1 n=5 (12.0%); score 2 n=5 (11.0%); score 3 n=9 (20.9%); score 4 n=19 (44.2%); score 5 n=3 (7.0%); score 6 n=2 (4.7%); score 7 n=0) (**see figure 3**). Compared to baseline motor symptom improvement (score 1,2 or 3) occurred in 35 of 43 patients (81.4%) (score 1 n=10 (23.3%); score 2 n=10 (23.3 %); score 3 n=15 (34.9%); score 4 n=5 (11.6%); score 5 n=3 (7.0%), score 6 or 7 n=0).

The CGI-I scored by the patient revealed a perceived motor improvement compared to the end of trial in 24 of 43 patients (55.8%) (score 1 n=5 (11.5%); score 2 n=11 (25.0%); score 3 n=8 (18.2%); score 4 n=17 (38.6%); score 5 n=1 (2.3%); score 6 n=1 (2.3%); score 7 n=1 (2.3%)) (**see figure 3**).

Compared to baseline perceived motor symptom improvement occurred in 29 of 43 patients (67.4%) (score 1 n=11 (25.6%); score 2 n=14 (32.6%); score 3 n=4 (9.3%); score 4 n=12 (27.9%); score 5 n=1 (2.3%); score 6 n=6 (2.3%); score 7 n=0).

### References

1. Feinstein A. Clinimetric Perspectives. J Chron Dis 1987;40:635-40.
2. Landis JR, Koch GG. The measurement of observer agreement for categorical data. Biometrics 1977;33:159-74.

### Appendix 3. Statistical analysis plan

#### Overall principles

The data analysis will start after the 12-month follow-up data of the last included patient has been obtained, and after the study database has been cleaned and locked.

The analyses will be done by investigator (YD) supervised by the principal investigator (MAJdKT) and an independent epidemiologist/statistician of the AMC Clinical Research Unit (RdH). The statistical programming and analysis to produce all summary tables and figures will use the statistical package IBM SPSS statistics version 22.

In general, variables will be summarized using simple descriptive statistics such as means with standard deviation for continuous symmetric variables, medians and interquartile ranges for continuous skewed variables, and frequencies with percentages for categorical variables.

All analyses will be done according to the intention-to-treat principle, by analysing patients in the groups to which they were allocated by randomisation. The analyses will first be performed blind to treatment allocation, to allow for checking of the data and the proposed summaries/analyses. After the investigation and correction of any isolated or systematic data errors, treatment allocation will be unmasked.

The primary outcome will be analysed in the pre-specified subgroups below, irrespective of the presence of statistical significance in the overall analysis. Safety outcomes will be additionally analysed in the as-treated (not per-protocol) population.

#### Overall level of statistical significance

According to Haybittle-Peto's stopping rule, no adjustment of the p-value will be used for the final analysis [20]. A two-sided p-value < 0.05 will be considered statistically significant. Statistical uncertainty will be expressed in a two-sided 95% CI.

#### Missing data

Missing baseline and outcome data will not be imputed. We will state which data are missing and calculate frequencies using the total number of patients with available data. When a patient is lost to follow-up or has withdrawn consent, we will use all available data up until withdrawal of consent or loss to follow-up. A specific section in the paper will report on missing data.

#### Poweranalysis

A two group Chi-square test with a 0,05 two-sided significance level will have 80% power to detect the difference between a control group proportion of 0,30 and a treatment group proportion of 0,70 (odds ratio of 5,4) when the sample size in each group is 24. As the side effects of therapy are mild and self-limiting and because only two injections are given in the trial period, we expect practically no withdrawals in this phase of the study. Assuming a withdrawal rate of 10 percent, we plan to include 27 patients per treatment arm, which means 54 patients in total.

#### Population

##### Intention-to-treat population

All randomised patients will be analysed in the treatment group to which they were originally allocated irrespective of non-adherence or deviations from protocol.

##### As-treated population

Patients will be analysed in groups according to treatment received. The patients will still be included in the as-treated analysis if there was a protocol violation (e.g. not receiving treatment within the described time-frame, not receiving the correct treatment, or not meeting inclusion or exclusion criteria).

#### List of analyses

#### Recruitment and retention

The trial profile and inclusion will be shown in a CONSORT flow diagram (*figure 1*), including the total number of randomised patients and then showing per treatment group the numbers receiving allocated treatment, withdrawing consent, and lost to follow up.

#### Baseline characteristics

##### *Table 1: Patient characteristics*

Treatment group vs placebo group

Age (mean or median)

Gender

Duration of symptoms (mean or median)

Site of jerks

Abdominal vs extremity

Medication usage

Presence of Bereitschaftspotential

#### Protocol deviations and violations

All substantial protocol violations will be listed.

### Adherence to allocated treatment

Adherence will be reported descriptively.

### Primary outcome

An intention to treat analysis will be performed with regard to the trial results. The difference in the proportions of patients reaching the primary outcome measure (score 1,2 of 3 on CGI) between the groups treated with BoNT and with placebo will be assessed using the  $\chi^2$  statistic or Fisher's exact test, when appropriate. The CGI will be dichotomized to improvement (score 1,2 of 3) vs no change or worsening (score 4,5,6,7). A binary logistic regression analysis will be performed to correct for the treatment group (BoNT vs. placebo) and stratification-factor (axialvs. extremity). The effect size will be expressed in an odd's ratio.

### Secondary outcomes

For the secondary outcome measures, proportional differences between the groups will be tested with the  $\chi^2$  statistic or Fischer's exact test when appropriate. Difference in change scores of the continuous secondary outcome measures will be calculated. The mean or median differences will be analysed with a Students t-test or Mann-Whitney (when appropriate). Statistical uncertainty will be expressed with a 95% CI.

For the long term effects, the within group change scores at t=16 months will be compared with previous assessments (end of trial and baseline) using tests for paired data (Wilcoxon Signed Rank).

### Safety outcomes

Safety outcomes will be reported in the intention-to treat and as-treated populations using descriptive statistics.

#### Subgroup analyses

No subgroup analysis will be performed because of the small amount of patients and hence the lack of power.

**Appendix 4. Video protocol****1. Informed consent****2. Rest (sitting on research bench)**

|                       |            |
|-----------------------|------------|
| Total body            | 2 minutes  |
| Focus on face         | 20 seconds |
| Reading standard text |            |

**3. Action**

|                                             |            |
|---------------------------------------------|------------|
| Stretching out arms, palms facing downwards | 30 seconds |
| Stretching out arms, palms facing upwards   | 30 seconds |
| Bending arms in front of chest              | 20 seconds |
| Fingertapping                               | 10x        |
| Bradykinesia                                | 10x        |
| Finger-to-nose (right and left)             | 5x         |
| Stretching out leg (right and left)         | 20 sec     |

|                      |                                              |            |
|----------------------|----------------------------------------------|------------|
| Attention task       | Subtracting 100 minus 7                      |            |
|                      | Subtracting 100 minus 13                     |            |
|                      | Counting the months of the year backwards    |            |
| Entrainment:         | tapping along with metronome: 112 en 138 bpm |            |
| Suppressing symptoms |                                              | 10 seconds |

|                                                    |            |
|----------------------------------------------------|------------|
| <b><u>4. Leaving patient alone in the room</u></b> | 2 minutes  |
| <b><u>5. Standing</u></b>                          |            |
| From four different angles                         | 30 seconds |
| <b><u>6. Research bench</u></b>                    |            |
| - Testing tendon reflexes                          |            |
| - Lying supine                                     | 30 seconds |
| <b><u>7. Gait</u></b>                              | 30 seconds |
